# Supplementary material for: Mitochondrial fusion is required for spermatogonial differentiation and meiosis
Source: eLife journal article supplement (doi:10.7554/elife.51601), 2019-10-09

Wild-type

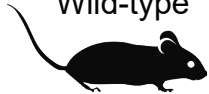

MEFs

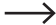

Heavy (H)

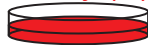

Mito  
Isolation

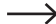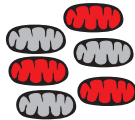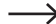

Comparative  
Mitochondrial  
Proteomics  
(Gene Ontology)

*Mfn1/2*-null

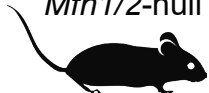

MEFs

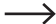

Light (L)

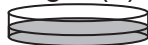

Supplement: supp [file elife-51601-supp-v1.zip]
