# Supplementary material for: Mitochondrial fusion is required for spermatogonial differentiation and meiosis
Source: eLife. 2019 Oct 9;8:e51601. doi: 10.7554/eLife.51601 (PMC6805159; doi:10.7554/eLife.51601)
Supplement: Supplementary file 1. — SILAC was performed on mitochondria isolated from WT or Mfn1/Mfn2-null MEFs. Related to Figure 6A. [file elife-51601-supp1.xlsx]

## Sheet: Gene Ontology Enrichment
	Mitochondrial Translation
	GO ID	GO Term Name	Mfn1/2-null:WT (L:H) Ratio	Adj p-value*		*All p-values were adjusted using the Benjamini and Hochberg method (Benjamini and Hochberg, 1995).
	GO:0005840	ribosome	0.753236	1.62e-17
	GO:0044391	ribosomal subunit	0.754001	7.24e-17
	GO:0003735	structural constituent of ribosome	0.742623	2.93e-16
	GO:0005761	mitochondrial ribosome	0.762657	5.35e-16
	GO:1990904	ribonucleoprotein complex	0.785203	1.64e-13
	GO:0015934	large ribosomal subunit	0.736156	3.49e-12
	GO:0005762	mitochondrial large ribosomal subunit	0.746224	5.43e-11
	GO:0005198	structural molecule activity	0.77349	1.03e-09
	GO:0015935	small ribosomal subunit	0.792572	0.000377
	GO:0005763	mitochondrial small ribosomal subunit	0.821397	0.00236
	GO:0022626	cytosolic ribosome	0.622174	0.0124
	OXPHOS
	GO ID	GO Term Name	Mfn1/2-null:WT (L:H) Ratio	Adj p-value
	GO:0045271	respiratory chain complex I	0.694038	4.01e-07
	GO:0005746	mitochondrial respiratory chain	0.754206	1.46e-06
	GO:0070469	respiratory chain	0.763322	2.89e-06
	GO:0098803	respiratory chain complex	0.755761	4.12e-06
	GO:0000276	mitochondrial proton-transporting ATP synthase complex, coupling factor F(o)	0.872721	0.0104
	GO:0045277	respiratory chain complex IV	0.689255	0.0118
	GO:0016655	oxidoreductase activity, acting on NAD(P)H, quinone or similar compound as acceptor	0.690864	0.0251
	GO:0005751	mitochondrial respiratory chain complex IV	0.701032	0.0328
	Mitochondrial Import
	GO ID	GO Term Name	Mfn1/2-null:WT (L:H) Ratio	Adj p-value
	GO:0044743	protein transmembrane import into intracellular organelle	1.48629	0.00236
	GO:0017038	protein import	1.38984	0.00718
	GO:0072321	chaperone-mediated protein transport	1.66909	0.0124
	GO:0006839	mitochondrial transport	1.23751	0.0247
	Miscellaneous
	GO ID	GO Term Name	Mfn1/2-null:WT (L:H) Ratio	Adj p-value
	GO:0098798	mitochondrial protein complex	0.864914	3.62e-05
	GO:0032991	protein-containing complex	0.893858	0.00193
	GO:0051604	protein maturation	1.35151	0.0326
