# Supplementary material for: Mitochondrial fusion is required for spermatogonial differentiation and meiosis
Source: eLife. 2019 Oct 9;8:e51601. doi: 10.7554/eLife.51601 (PMC6805159; doi:10.7554/eLife.51601)
Supplement: Supplementary file 2. — Related to Figure 6B. [file elife-51601-supp2.xlsx]

## Sheet: Sheet1
						Legend:	Reduced in mutant	Increased in Mutant	p<0.05
	Complex I
	Protein names	Gene names	Mfn1/2-null:WT (L:H) Ratio	p-value
	NADH dehydrogenase [ubiquinone] 1 beta subcomplex subunit 2, mitochondrial	Ndufb2	0.412312	1.58174e-05
		Ndufv3	0.432184	4.61471e-05
	NADH dehydrogenase [ubiquinone] 1 alpha subcomplex subunit 12	Ndufa12	0.533228	0.00330379
	NADH dehydrogenase [ubiquinone] iron-sulfur protein 5;NADH dehydrogenase [ubiquinone] iron-sulfur protein 5, N-terminally processed	Ndufs5	0.540987	0.00421297
	NADH dehydrogenase [ubiquinone] 1 subunit C2	Ndufc2	0.544258	0.00467819
	NADH dehydrogenase [ubiquinone] 1 beta subcomplex subunit 8, mitochondrial	Ndufb8	0.438297	0.00671162
	NADH dehydrogenase [ubiquinone] 1 beta subcomplex subunit 9	Ndufb9	0.559676	0.00694739
	NADH dehydrogenase [ubiquinone] 1 alpha subcomplex subunit 7	Ndufa7	0.590122	0.0153031
	NADH dehydrogenase [ubiquinone] 1 alpha subcomplex subunit 10, mitochondrial	Ndufa10	0.606115	0.0213922
	NADH dehydrogenase [ubiquinone] 1 beta subcomplex subunit 3	Ndufb3	0.606594	0.0215717
	NADH dehydrogenase [ubiquinone] iron-sulfur protein 4, mitochondrial	Ndufs4	0.607427	0.0218577
	NADH dehydrogenase [ubiquinone] 1 alpha subcomplex subunit 1	Ndufa1	0.501823	0.0246759
	NADH dehydrogenase [ubiquinone] iron-sulfur protein 6, mitochondrial	Ndufs6	0.628791	0.0327611
	NADH dehydrogenase [ubiquinone] 1 beta subcomplex subunit 10	Ndufb10	0.650913	0.0483309
	NADH dehydrogenase [ubiquinone] 1 beta subcomplex subunit 7	Ndufb7	0.660929	0.0583454
	NADH dehydrogenase [ubiquinone] 1 beta subcomplex subunit 4	Ndufb4	0.662652	0.0599814
	NADH dehydrogenase [ubiquinone] flavoprotein 1, mitochondrial	Ndufv1	0.677496	0.0772816
	NADH dehydrogenase [ubiquinone] 1 beta subcomplex subunit 5, mitochondrial	Ndufb5	0.678737	0.078772
	NADH dehydrogenase [ubiquinone] 1 alpha subcomplex subunit 5	Ndufa5	0.682517	0.0837373
	NADH dehydrogenase [ubiquinone] iron-sulfur protein 2, mitochondrial	Ndufs2	0.697429	0.106431
	NADH dehydrogenase [ubiquinone] 1 alpha subcomplex subunit 6	Ndufa6	0.702976	0.113612
	NADH dehydrogenase [ubiquinone] iron-sulfur protein 8, mitochondrial	Ndufs8	0.719444	0.143338
	NADH dehydrogenase [ubiquinone] flavoprotein 2, mitochondrial	Ndufv2	0.732146	0.167721
	NADH-ubiquinone oxidoreductase 75 kDa subunit, mitochondrial	Ndufs1	0.747372	0.205308
	NADH dehydrogenase [ubiquinone] iron-sulfur protein 3, mitochondrial	Ndufs3	0.753178	0.218067
	NADH dehydrogenase [ubiquinone] 1 alpha subcomplex subunit 9, mitochondrial	Ndufa9	0.769755	0.258307
	NADH dehydrogenase [ubiquinone] 1 beta subcomplex subunit 11, mitochondrial	Ndufb11	0.739621	0.37641
	NADH dehydrogenase [ubiquinone] 1 beta subcomplex subunit 6	Ndufb6	0.751418	0.398654
	NADH dehydrogenase [ubiquinone] iron-sulfur protein 7, mitochondrial	Ndufs7	0.852761	0.516673
	NADH dehydrogenase [ubiquinone] 1 alpha subcomplex subunit 2	Ndufa2	0.870262	0.577854
	Cytochrome c oxidase subunit NDUFA4	Ndufa4	0.922873	0.765116
	NADH dehydrogenase [ubiquinone] 1 alpha subcomplex subunit 8	Ndufa8	1.07257	0.799671
	Acyl carrier protein;Acyl carrier protein, mitochondrial	Ndufab1	1.05386	0.862189
	NADH dehydrogenase [ubiquinone] 1 alpha subcomplex subunit 13	Ndufa13	1.0437	0.888717
	Complex I Assembly Factor
	Protein names	Gene names	Mfn1/2-null:WT (L:H) Ratio	p-value
	Mimitin, mitochondrial	Ndufaf2	2.66823	1.39217e-06
	Complex I assembly factor TIMMDC1, mitochondrial	Timmdc1	1.79235	0.00671162
	NADH dehydrogenase [ubiquinone] 1 alpha subcomplex assembly factor 4	Ndufaf4	1.69104	0.0157879
	NADH dehydrogenase (ubiquinone) complex I, assembly factor 6	Ndufaf6	1.57173	0.0365375
	NADH dehydrogenase [ubiquinone] 1 alpha subcomplex subunit 11	Ndufa11	1.47054	0.0803557
	NADH dehydrogenase [ubiquinone] 1 alpha subcomplex assembly factor 3	Ndufaf3	1.63861	0.11643
	Complex I intermediate-associated protein 30, mitochondrial	Ndufaf1	1.3629	0.359758
	NADH dehydrogenase [ubiquinone] 1 alpha subcomplex assembly factor 5	Ndufaf5	1.19044	0.472242
	NADH dehydrogenase [ubiquinone] complex I, assembly factor 7	Ndufaf7	0.878319	0.603641
	Complex II
	Protein names	Gene names	Mfn1/2-null:WT (L:H) Ratio	p-value
	Succinate dehydrogenase [ubiquinone] flavoprotein subunit, mitochondrial	Sdha	1.30308	0.25234
	Succinate dehydrogenase [ubiquinone] cytochrome b small subunit, mitochondrial	Sdhd	1.13699	0.731316
	Succinate dehydrogenase [ubiquinone] iron-sulfur subunit, mitochondrial	Sdhb	1.07159	0.802851
	Succinate dehydrogenase cytochrome b560 subunit, mitochondrial	Sdhc	1.06416	0.826563
	Complex II Assembly Factor
	Protein names	Gene names	Mfn1/2-null:WT (L:H) Ratio	p-value
	Succinate dehydrogenase assembly factor 2, mitochondrial	Sdhaf2	2.66482	1.40437e-06
	Succinate dehydrogenase assembly factor 4, mitochondrial	Sdhaf4	1.80017	0.0571979
	Complex III
	Protein names	Gene names	Mfn1/2-null:WT (L:H) Ratio	p-value
	Cytochrome b-c1 complex subunit 8	Uqcrq	0.60764	0.0218775
	Cytochrome b-c1 complex subunit 7	Uqcrb	0.626141	0.0311355
	Cytochrome b-c1 complex subunit 2, mitochondrial	Uqcrc2	0.640742	0.0389479
	Cytochrome b-c1 complex subunit 1, mitochondrial	Uqcrc1	0.701763	0.111896
	Cytochrome b-c1 complex subunit Rieske, mitochondrial;Cytochrome b-c1 complex subunit 11	Uqcrfs1	0.706026	0.117765
	Cytochrome c1, heme protein, mitochondrial	Cyc1	1.45304	0.0926769
	Cytochrome b-c1 complex subunit 9	Uqcr10	1.45823	0.248101
	Cytochrome b-c1 complex subunit 6, mitochondrial	Uqcrh	1.49719	0.0661442
	Complex III Assembly Factor
	Protein names	Gene names	Mfn1/2-null:WT (L:H) Ratio	p-value
	Ubiquinol-cytochrome-c reductase complex assembly factor 2	Uqcc2	1.39436	0.31998
	Ubiquinol-cytochrome-c reductase complex assembly factor 1	Uqcc1	1.17931	0.496656
	Complex IV
	Protein names	Gene names	Mfn1/2-null:WT (L:H) Ratio	p-value
	Cytochrome c oxidase subunit 2	Mtco2	0.546211	0.00494344
	Cytochrome c oxidase subunit 7C, mitochondrial	Cox7c	0.54849	0.0513134
	Cytochrome c oxidase subunit 7B, mitochondrial	Cox7b	0.581834	0.0828744
	Cytochrome c oxidase subunit 1	Mtco1	0.606107	0.111896
	Cytochrome c oxidase subunit 5B, mitochondrial	Cox5b	0.624345	0.0303806
	Cytochrome c oxidase subunit 7A2, mitochondrial	Cox7a2	0.640545	0.0389479
	Cytochrome c oxidase subunit 6C	Cox6c	0.648581	0.0461052
	Cytochrome c oxidase subunit 6B1	Cox6b1	0.698751	0.108142
	Cytochrome c oxidase subunit 6A, mitochondrial;Cytochrome c oxidase subunit 6A1, mitochondrial	Cox6a1	0.779123	0.284142
	Cytochrome c oxidase subunit 7A-related protein, mitochondrial	Cox7a2l	0.791276	0.322359
	Cytochrome c oxidase subunit 4 isoform 1, mitochondrial	Cox4i1	0.86548	0.558808
	Cytochrome c oxidase subunit 5A, mitochondrial	Cox5a	0.898188	0.672205
	Complex IV Assembly Factor
	Protein names	Gene names	Mfn1/2-null:WT (L:H) Ratio	p-value
	Cytochrome c oxidase assembly factor 7	Coa7	1.7906	0.00671162
	Cytochrome c oxidase copper chaperone	Cox17	1.69862	0.0148381
	Cytochrome c oxidase assembly protein COX19	Cox19	2.05885	0.0193178
	Cytochrome c oxidase assembly factor 6 homolog	Coa6	1.34091	0.387205
	Cytochrome c oxidase assembly protein COX15 homolog	Cox15	1.21709	0.415376
	COX assembly mitochondrial protein 2 homolog	Cmc2	0.83833	0.467732
	COX assembly mitochondrial protein homolog	Cmc1	0.881805	0.61625
	Cytochrome c oxidase protein 20 homolog	Cox20	0.898738	0.672425
	Cytochrome c oxidase assembly factor 3 homolog, mitochondrial	Coa3	1.03461	0.912054
	Complex V
	Protein names	Gene names	Mfn1/2-null:WT (L:H) Ratio	p-value
	ATP synthase subunit d, mitochondrial	Atp5h	0.8117	0.385987
	ATP synthase subunit g, mitochondrial	Atp5l	0.858314	0.528284
	ATP synthase subunit e, mitochondrial	Atp5i;Atp5k	0.870731	0.579232
	ATP synthase subunit O, mitochondrial	Atp5o	0.875024	0.592974
	ATP synthase F(0) complex subunit B1, mitochondrial	Atp5f1	0.887518	0.639001
	ATP synthase subunit f, mitochondrial	Atp5j2	0.893685	0.657423
	ATP synthase-coupling factor 6, mitochondrial	Atp5j	0.915838	0.740322
	ATP synthase subunit alpha, mitochondrial;ATP synthase subunit alpha	Atp5a1	0.934844	0.81006
	ATP synthase subunit gamma;ATP synthase subunit gamma, mitochondrial	Atp5c1	0.956155	0.883844
	ATP synthase subunit delta, mitochondrial	Atp5d	0.965355	0.912054
	ATP synthase subunit epsilon, mitochondrial	Atp5e	0.995066	0.990734
	ATP synthase subunit beta, mitochondrial	Atp5b	0.997754	0.99493
	ATP synthase subunit s, mitochondrial	Atp5s	1.2151	0.419852
	Complex V Assembly Factor
	Protein names	Gene names	Mfn1/2-null:WT (L:H) Ratio	p-value
	ATP synthase mitochondrial F1 complex assembly factor 2	Atpaf2	1.0867	0.757177
	ATP synthase mitochondrial F1 complex assembly factor 1	Atpaf1	0.721913	0.147114
	Mitochondrial Import
	Protein names	Gene names	Mfn1/2-null:WT (L:H) Ratio	p-value
	GrpE protein homolog 2, mitochondrial	Grpel2	2.71922	8.57749e-07
	Mitochondrial import inner membrane translocase subunit TIM50	Timm50	2.36153	3.01533e-05
	Mitochondrial import inner membrane translocase subunit Tim8 B	Timm8b	1.82907	0.0049963
	Mitochondrial import receptor subunit TOM40 homolog	Tomm40	1.82627	0.00510925
	Mitochondrial import inner membrane translocase subunit Tim9	Timm9	1.77169	0.00783614
	Mitochondrial import inner membrane translocase subunit Tim13	Timm13	1.65699	0.0208265
	Mitochondrial import receptor subunit TOM22 homolog	Tomm22	1.65171	0.0212029
	Mitochondrial import inner membrane translocase subunit Tim22	Timm22	1.59277	0.0322453
	Mitochondrial import inner membrane translocase subunit Tim8 A	Timm8a1	1.56236	0.0387469
	Mitochondrial import inner membrane translocase subunit Tim10	Timm10	1.54413	0.0452329
	Mitochondrial intermembrane space import and assembly protein 40	Chchd4	1.5156	0.0571979
	Mitochondrial import inner membrane translocase subunit TIM14	Dnajc19	0.6997	0.109765
	Mitochondrial import inner membrane translocase subunit Tim10 B	Timm10b	1.42194	0.11372
	Mitochondrial import inner membrane translocase subunit TIM44	Timm44	1.37285	0.160228
	Mitochondrial import receptor subunit TOM5 homolog	Tomm5	1.35215	0.185573
	Mitochondrial import receptor subunit TOM34	Tomm34	1.48083	0.22771
	GrpE protein homolog 1, mitochondrial	Grpel1	1.26759	0.315549
	Mitochondrial import inner membrane translocase subunit Tim23	Timm23	1.16143	0.538677
	Mitochondrial import inner membrane translocase subunit Tim17-B	Timm17b	0.983376	0.968014
	Mitochondrial import inner membrane translocase subunit TIM16	Pam16	0.988917	0.969463
	Mitochondrial import receptor subunit TOM70	Tomm70a	0.991182	0.977854
	Mitochondrial Ribosome
	Protein names	Gene names	Mfn1/2-null:WT (L:H) Ratio	p-value
	40S ribosomal protein S18	Gm10260;Rps18	0.52217	0.0023172
	40S ribosomal protein S15a	Rps15a	0.532313	0.0032174
	39S ribosomal protein L40, mitochondrial	Mrpl40	0.53898	0.00394009
	60S ribosomal protein L35a	Rpl35a	0.548767	0.0514007
	28S ribosomal protein S21, mitochondrial	Mrps21	0.572537	0.00985124
	39S ribosomal protein L46, mitochondrial	Mrpl46	0.572937	0.00991486
	39S ribosomal protein L38, mitochondrial	Mrpl38	0.576586	0.0108723
	39S ribosomal protein L28, mitochondrial	Mrpl28	0.580217	0.0116797
	28S ribosomal protein S14, mitochondrial	Mrps14	0.601617	0.107264
	60S ribosomal protein L34	Rpl34	0.605319	0.0212029
	39S ribosomal protein L27, mitochondrial	Mrpl27	0.609374	0.0222857
	28S ribosomal protein S33, mitochondrial	Mrps33	0.610094	0.0226248
	39S ribosomal protein L30, mitochondrial	Mrpl30	0.617424	0.026623
	39S ribosomal protein L47, mitochondrial	Mrpl47	0.618214	0.0270439
	39S ribosomal protein L18, mitochondrial	Mrpl18	0.618396	0.027049
	Ribosomal protein 63, mitochondrial	Mrpl57	0.62017	0.0279684
	39S ribosomal protein L44, mitochondrial	Mrpl44	0.628597	0.03274
	39S ribosomal protein L2, mitochondrial	Mrpl2	0.633587	0.0349877
	Ribosomal protein;60S ribosomal protein L10a	Rpl10a	0.634261	0.0353427
	40S ribosomal protein S14	Rps14	0.635648	0.0362923
	28S ribosomal protein S30, mitochondrial	Mrps30	0.652912	0.0502503
	39S ribosomal protein L37, mitochondrial	Mrpl37	0.668973	0.0671999
	39S ribosomal protein L51, mitochondrial	Mrpl51	0.672459	0.0714159
	39S ribosomal protein L24, mitochondrial	Mrpl24	0.673037	0.0720526
	28S ribosomal protein S15, mitochondrial	Mrps15	0.674623	0.0737547
	39S ribosomal protein L13, mitochondrial	Mrpl13	0.676398	0.0760388
	39S ribosomal protein L41, mitochondrial	Mrpl41	0.677021	0.076776
	28S ribosomal protein S11, mitochondrial	Mrps11	0.67746	0.231585
	28S ribosomal protein S18a, mitochondrial	Mrps18a	0.679023	0.0789793
	28S ribosomal protein S5, mitochondrial	Mrps5	0.689004	0.0932459
	28S ribosomal protein S12, mitochondrial	Mrps12	0.693433	0.264911
	39S ribosomal protein L19, mitochondrial	Mrpl19	0.694706	0.101961
	39S ribosomal protein L43, mitochondrial	Mrpl43	0.698153	0.107264
	39S ribosomal protein L52, mitochondrial	Mrpl52	0.714842	0.315429
	28S ribosomal protein S7, mitochondrial	Mrps7	0.719625	0.143392
	Mitochondrial ribosome-associated GTPase 1	Mtg1	0.728285	0.345584
	39S ribosomal protein L45, mitochondrial	Mrpl45	0.73818	0.182012
	39S ribosomal protein L3, mitochondrial	Mrpl3	0.740547	0.187514
	39S ribosomal protein L33, mitochondrial	Mrpl33	0.74332	0.194456
	39S ribosomal protein L11, mitochondrial	Mrpl11	0.744176	0.196444
	39S ribosomal protein L55, mitochondrial	Mrpl55	0.744224	0.385817
	39S ribosomal protein L1, mitochondrial	Mrpl1	0.757558	0.22771
	39S ribosomal protein L50, mitochondrial	Mrpl50	0.759406	0.231585
	39S ribosomal protein L15, mitochondrial	Mrpl15	0.765554	0.247556
	28S ribosomal protein S29, mitochondrial	Dap3	0.770091	0.258916
	39S ribosomal protein L49, mitochondrial	Mrpl49	0.777457	0.279775
	39S ribosomal protein L17, mitochondrial	Mrpl17	0.778234	0.465849
	28S ribosomal protein S18b, mitochondrial	Mrps18b	0.781285	0.290164
	39S ribosomal protein L9, mitochondrial	Mrpl9	0.796579	0.339216
	28S ribosomal protein S23, mitochondrial	Mrps23	0.796677	0.339216
	28S ribosomal protein S35, mitochondrial	Mrps35	0.798136	0.342256
	28S ribosomal protein S9, mitochondrial	Mrps9	0.806487	0.371638
	39S ribosomal protein L21, mitochondrial	Mrpl21	0.808959	0.380134
	39S ribosomal protein L54, mitochondrial	Mrpl54	0.81268	0.387205
	39S ribosomal protein L23, mitochondrial	Mrpl23	0.824147	0.582614
	39S ribosomal protein L14, mitochondrial	Mrpl14	0.830563	0.599438
	28S ribosomal protein S28, mitochondrial	Mrps28	0.830828	0.445281
	28S ribosomal protein S22, mitochondrial	Mrps22	0.83483	0.457233
	28S ribosomal protein S25, mitochondrial	Mrps25	0.836784	0.463865
	39S ribosomal protein L39, mitochondrial	Mrpl39	0.840193	0.472242
	28S ribosomal protein S2, mitochondrial	Mrps2	0.84589	0.491086
	39S ribosomal protein L16, mitochondrial	Mrpl16	0.847256	0.494557
	28S ribosomal protein S34, mitochondrial	Mrps34	0.855579	0.52352
	28S ribosomal protein S26, mitochondrial	Mrps26	0.856635	0.526006
	28S ribosomal protein S17, mitochondrial	Mrps17	0.857101	0.526006
	39S ribosomal protein L20, mitochondrial	Mrpl20	0.866767	0.564249
	39S ribosomal protein L4, mitochondrial	Mrpl4	0.888333	0.640393
	39S ribosomal protein L22, mitochondrial	Mrpl22	0.889172	0.642445
	39S ribosomal protein L32, mitochondrial	Mrpl32	0.889638	0.643624
	28S ribosomal protein S24, mitochondrial	Mrps24	0.890511	0.761475
	28S ribosomal protein S31, mitochondrial	Mrps31	0.925835	0.77685
	28S ribosomal protein S27, mitochondrial	Mrps27	0.948708	0.862189
	28S ribosomal protein S10, mitochondrial	Mrps10	0.977402	0.944726
	39S ribosomal protein L53, mitochondrial	Mrpl53	0.985012	0.961976
	39S ribosomal protein L10, mitochondrial	Mrpl10	1.11005	0.682176
	28S ribosomal protein S16, mitochondrial	Mrps16	1.15007	0.703453
	28S ribosomal protein S6, mitochondrial	Mrps6	1.15335	0.564663
	28S ribosomal protein S36, mitochondrial	Mrps36	1.23244	0.385817
	39S ribosomal protein L42, mitochondrial	Mrpl42	1.24767	0.5235
	39S ribosomal protein L12, mitochondrial	Mrpl12	1.42076	0.114454
	Miscelleneous
	Protein names	Gene names	Mfn1/2-null:WT (L:H) Ratio	p-value
	Mitochondrial pyruvate carrier 2	MPC2	0.479398	0.000457464
	Transcription factor A, mitochondrial	Tfam	0.555052	0.0063332
