# Supplementary figures and images for: Mitochondrial fusion is required for spermatogonial differentiation and meiosis
Source: eLife journal article supplement (doi:10.7554/elife.51601), 2019-10-09

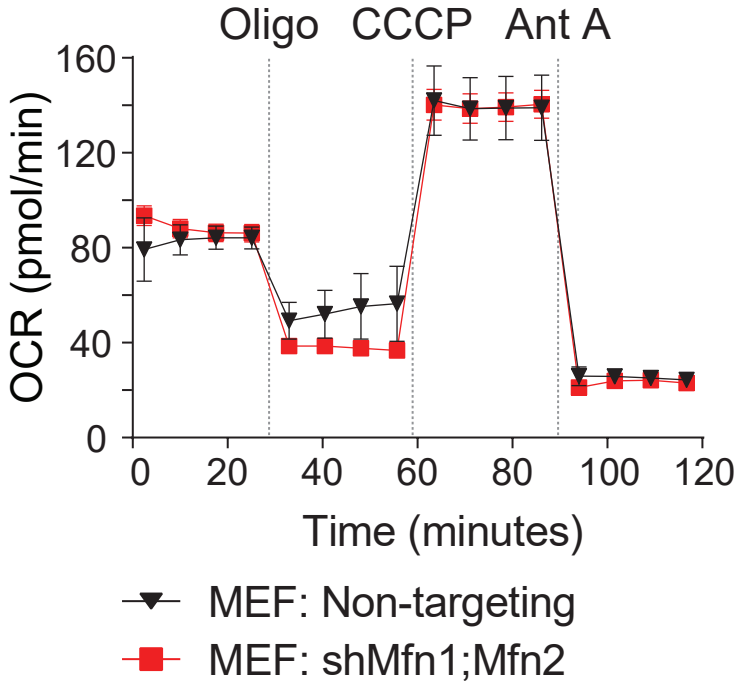

Supplement: supp [file elife-51601-supp-v1.zip]

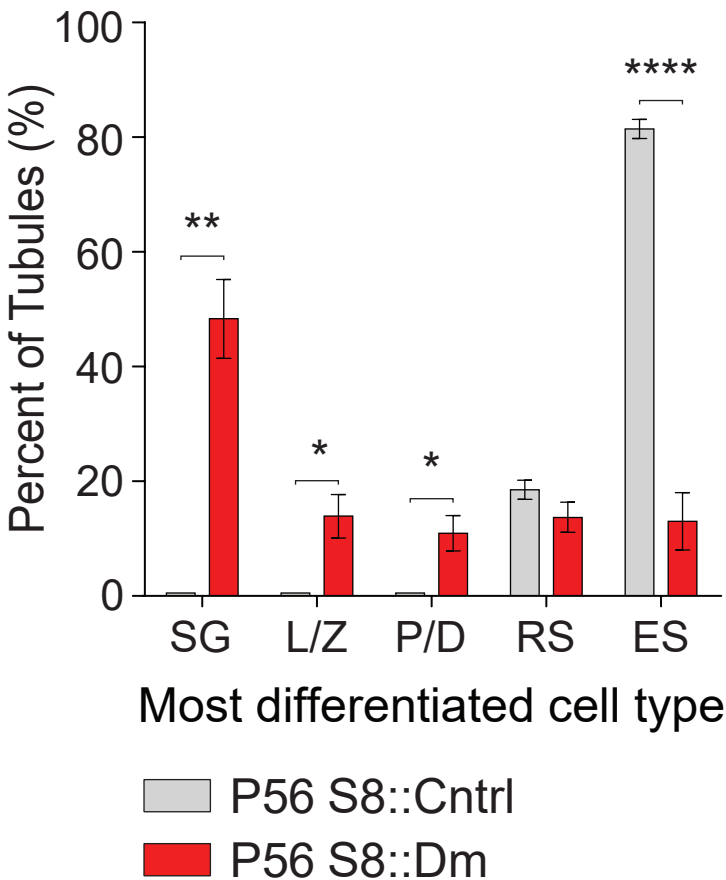

Supplement: supp [file elife-51601-supp-v1.zip]

**A**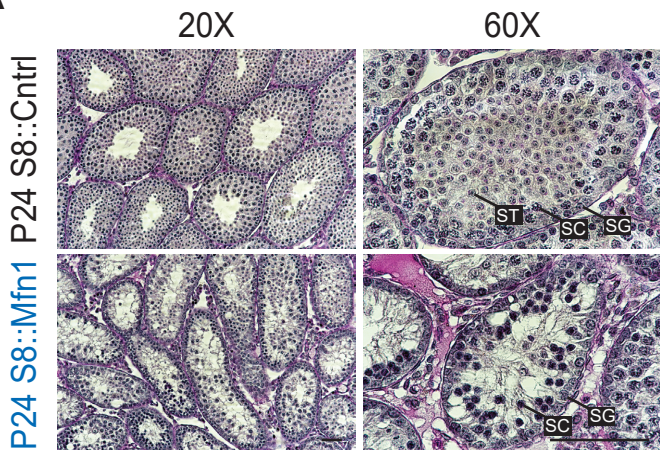**B**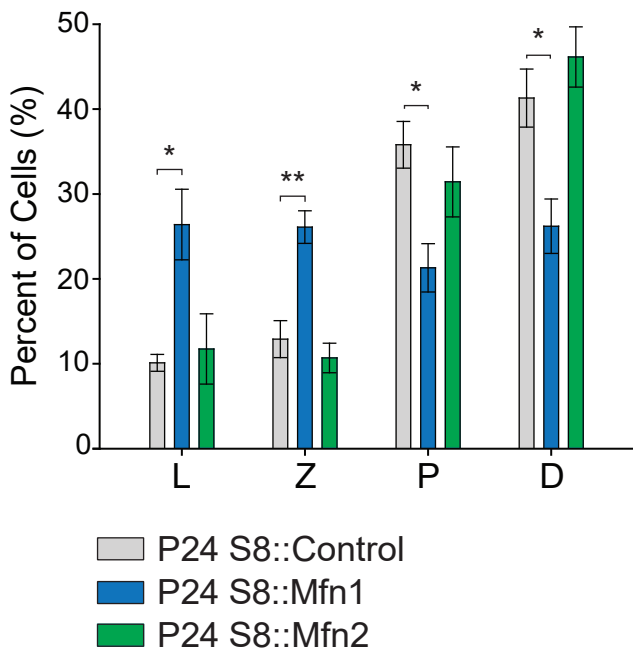

Supplement: supp [file elife-51601-supp-v1.zip]

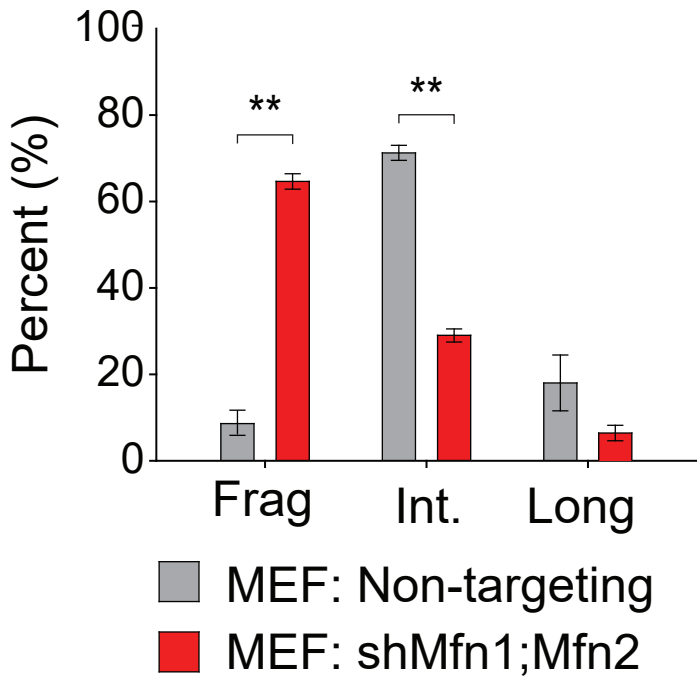

Supplement: supp [file elife-51601-supp-v1.zip]

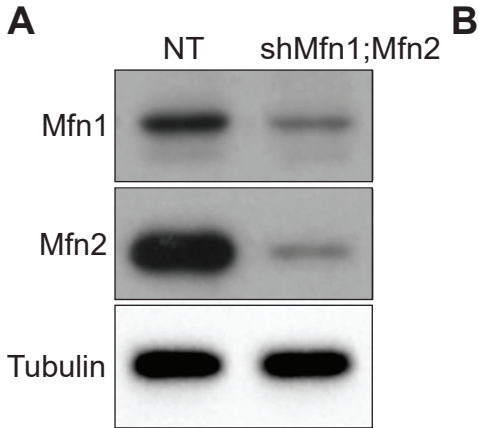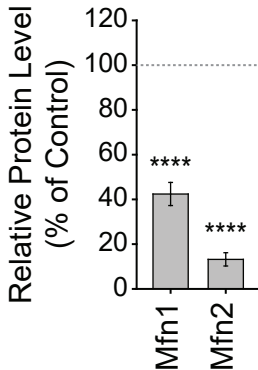

Supplement: supp [file elife-51601-supp-v1.zip]

P116 S8::Dm

Dn | PLZF | DAPI

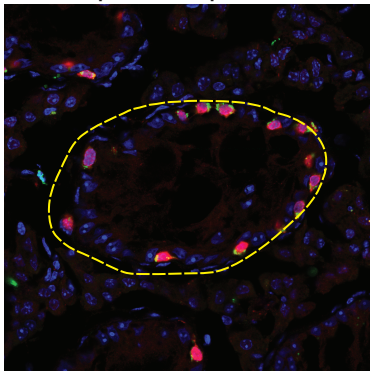

Dn | Ki-67 | DAPI

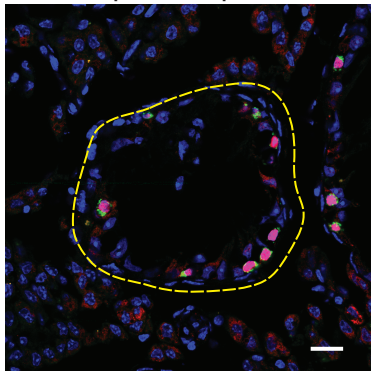

Supplement: supp [file elife-51601-supp-v1.zip]

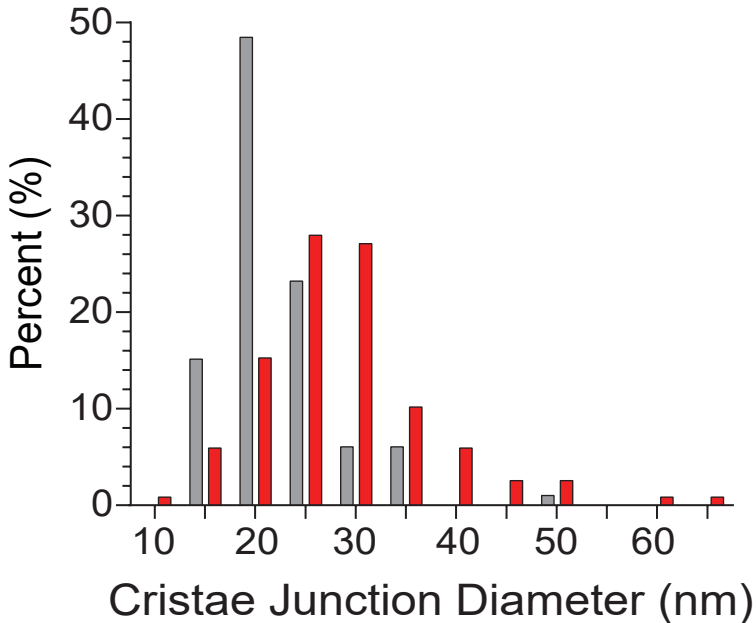

■ P56 S8::Cntrl  
■ P56 S8::Dm

Supplement: supp [file elife-51601-supp-v1.zip]

2N

PLZF | DAPI

40X Magnification

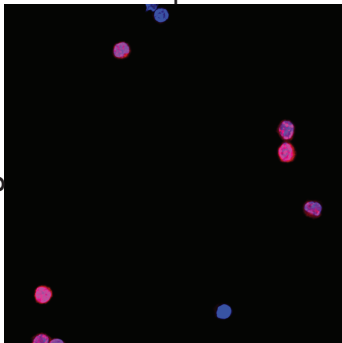

20X Magnification

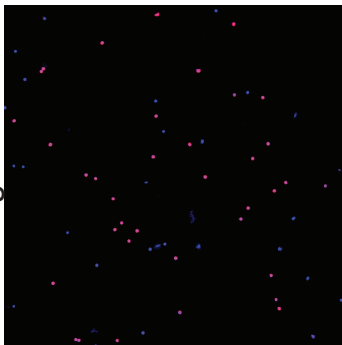

4N

SCP3 | DAPI

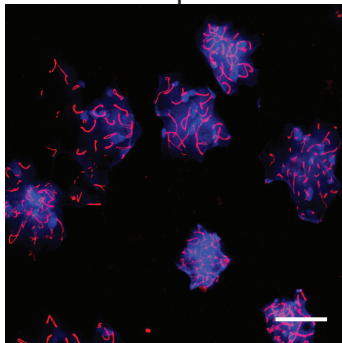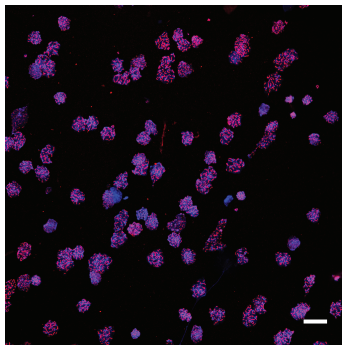

Supplement: supp [file elife-51601-supp-v1.zip]

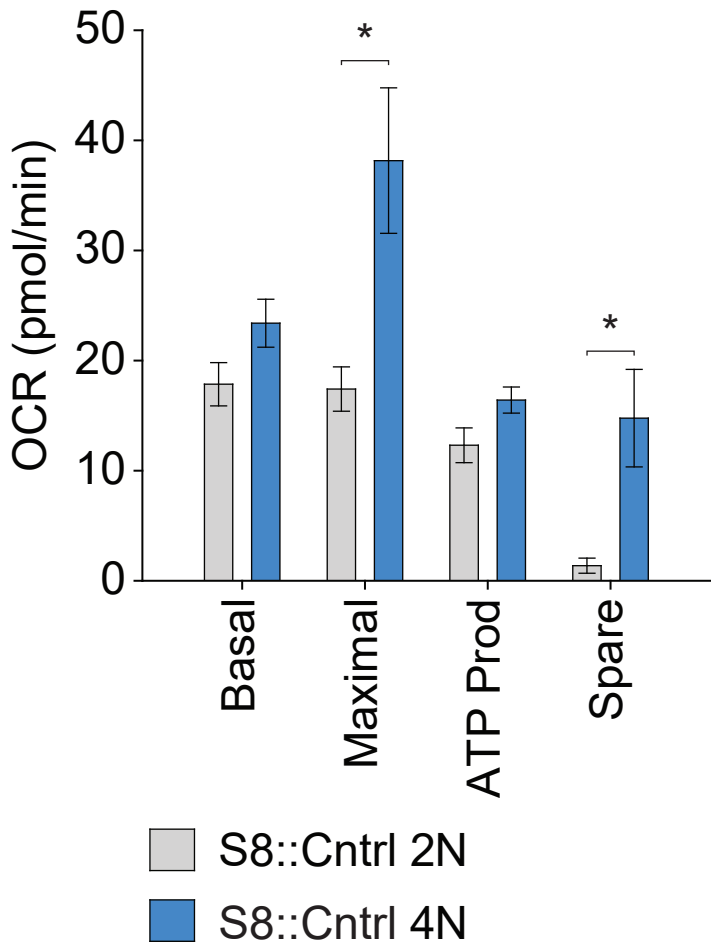

Supplement: supp [file elife-51601-supp-v1.zip]

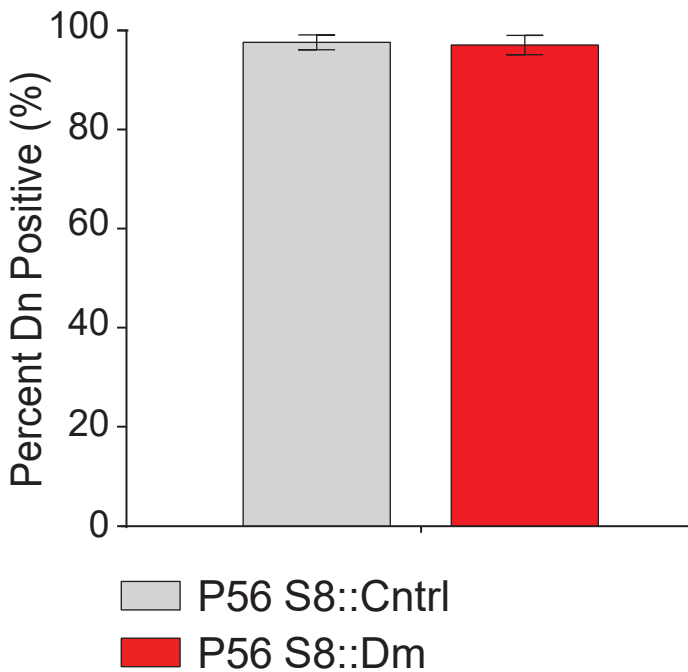

Supplement: supp [file elife-51601-supp-v1.zip]

Dn | Tom20

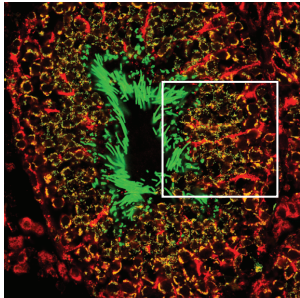

Inset

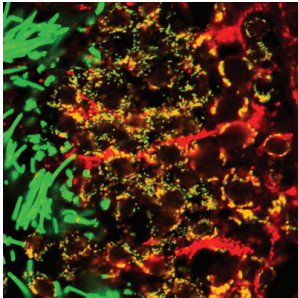

Tom20

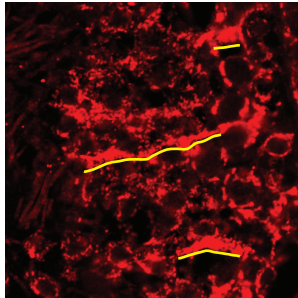

Dn

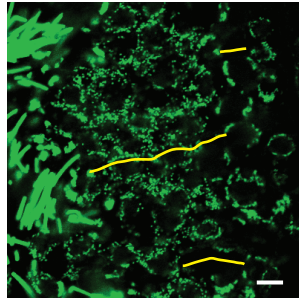

Supplement: supp [file elife-51601-supp-v1.zip]

**A**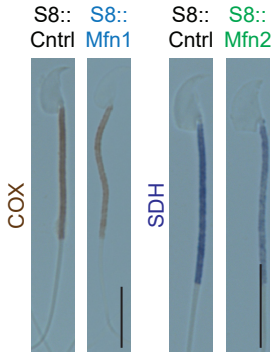**B**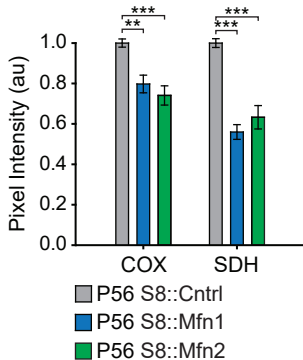

Supplement: supp [file elife-51601-supp-v1.zip]

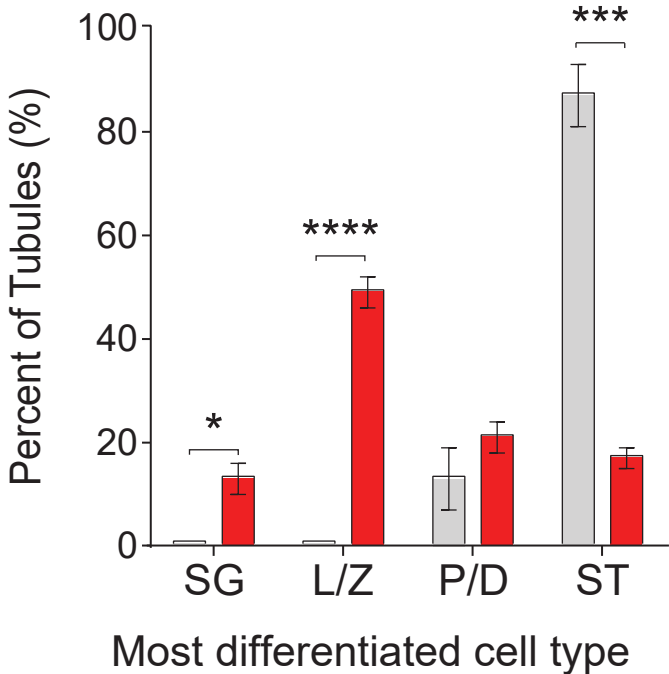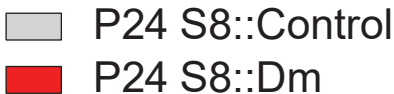

Supplement: supp [file elife-51601-supp-v1.zip]

**A**

Differentiated SG

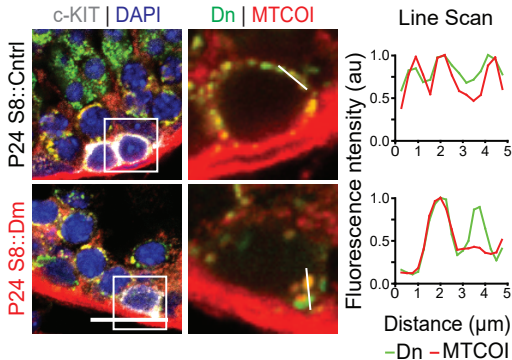**B**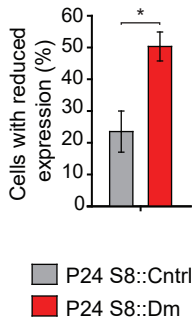

Undifferentiated SG

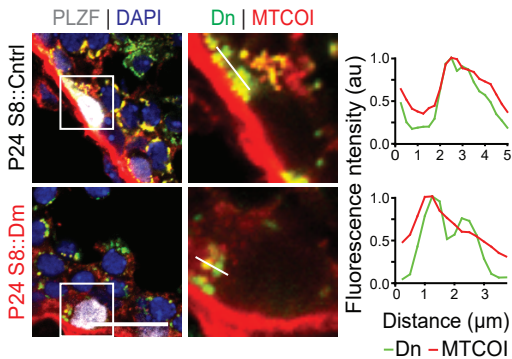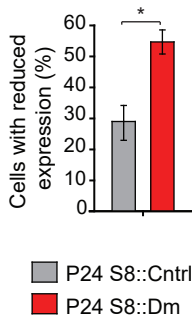

Supplement: supp [file elife-51601-supp-v1.zip]

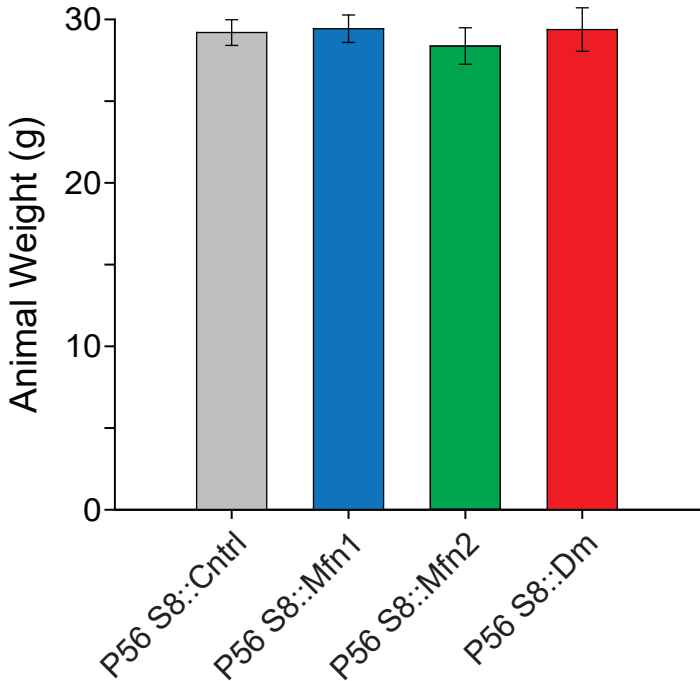

Supplement: supp [file elife-51601-supp-v1.zip]

**A**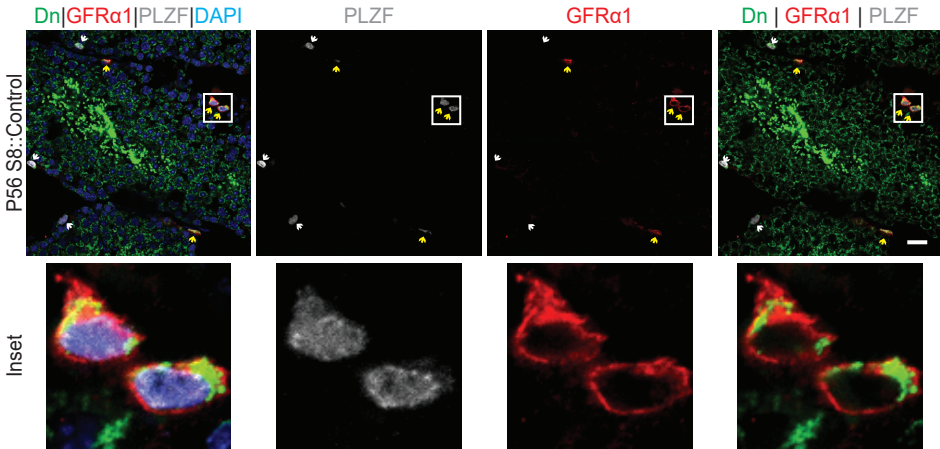**B**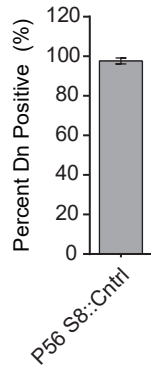

Supplement: supp [file elife-51601-supp-v1.zip]

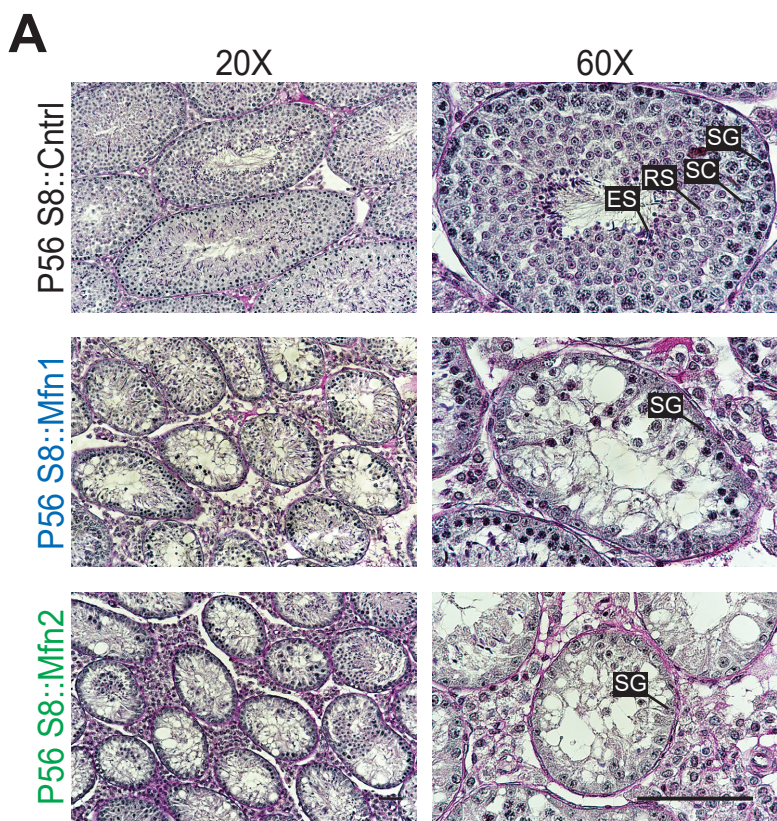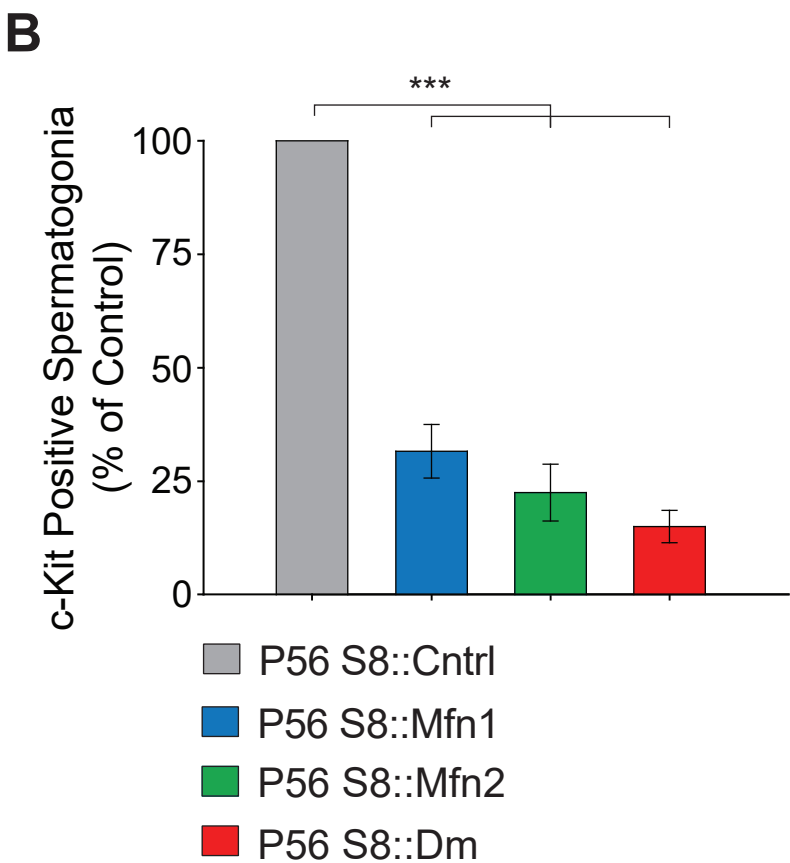

Supplement: supp [file elife-51601-supp-v1.zip]

GC - Non targeting

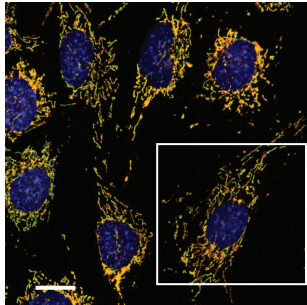

Inset

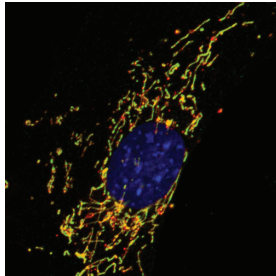

GC - shMfn1;Mfn2

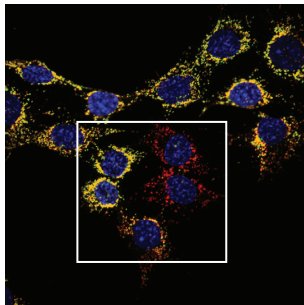

Inset

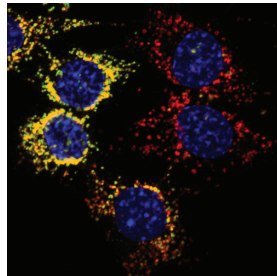

Supplement: supp [file elife-51601-supp-v1.zip]
